# Supplementary material
Source: PubMed Central journal article supplement (PMC4249289)
Supplement: IAI.02426-14_zii999090977so1.pdf [file IAI.02426-14_zii999090977so1.pdf]

## Supplemental material

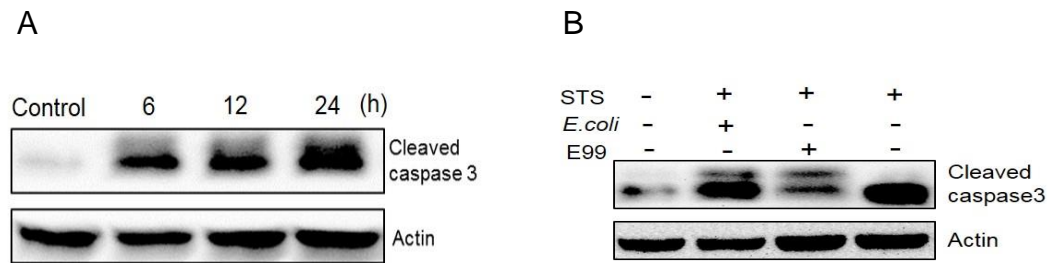

**Figure S1. Effects of *E. coli* infection on caspase 3 processing.** RAW264.7 cells infected with *E. coli* DH5 $\alpha$  for 1 h at a multiplicity of infection (MOI) of 10 or without infection (Control), were washed thrice with PBS and further incubated with DMEM plus 10% FBS containing vancomycin (16  $\mu$ g/mL) and gentamicin (150  $\mu$ g/mL) to kill all extracellular bacteria. (A) The cells at different time points were processed for Western blot analysis using antibodies to cleaved caspase 3. (B) Cells at 12 h post infection were treated with STS for 5 h before being lysed for Western blot analysis using antibodies to cleaved caspase 3.
